# Supplementary material for: Laser-induced fluorescence spectroscopy for early disease detection in grapefruit plants
Source: Royal Society of Chemistry journal article supplement (doi:10.1039/c9pp00368a), 2020-04-08
Supplement: c9pp00368a2.pdf [file c9pp00368a2.pdf]

- Fig. S1: Chlorophyll fluorescence spectra of sites H-1a, H-1b and H-1c from healthy leaf-1, H-2a, H-2b and H-2c from leaf-2 and D-1a, D-2b, D-2c, D-3a, D-3c, D-4b & D-4c from diseased leaves recorded by shining them with violet laser at 405 nm.
- Fig. S2: PCA score plot of sites H-1a, H-1b and H-1c from healthy leaf-1, H-2a, H-2b and H-2c from leaf-2 and D-1a, D-2b, D-2c, D-3a, D-3c, D-4b & D-4c was produced by PCA code when applied on their emission spectra recorded by violet laser diode at 405 nm.
- Fig. S3: (a) The loading vector of PC1 verses emission wavelengths.  
(b) The loading vector of PC2 verses emission wavelengths.
- Fig. S4: It displays average emission spectra (solid lines) of healthy and diseased plant leaves along with the beta curve which represent positive and negative correlations with spectral features associated with diseased leaves. The shaded region along the average spectra is the standard deviation that is displayed to depict the spectra to spectra variations.
- Fig. S5: (a) It displays the percent variance in data as a function of PLS components which were used to develop the model.  
(b) It displays the estimated mean square prediction error (EMSPE) at different number of latent variables used in the development of model.
