# Supplementary figures and images for: Laser-induced fluorescence spectroscopy for early disease detection in grapefruit plants
Source: Royal Society of Chemistry journal article supplement (doi:10.1039/c9pp00368a), 2020-04-08

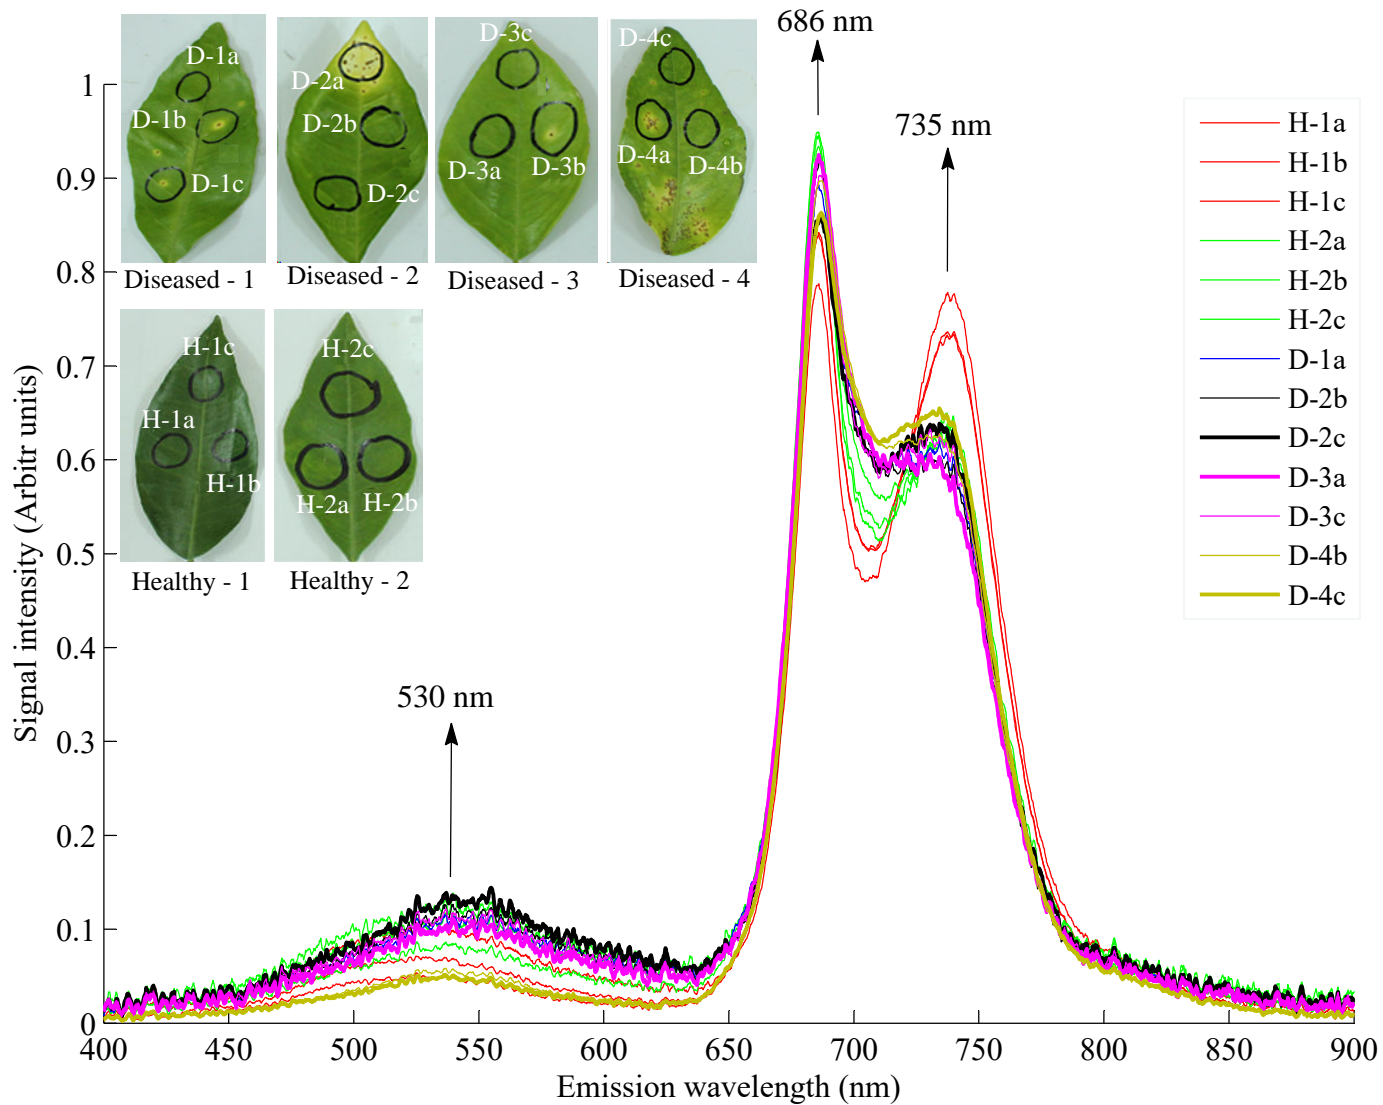

Fig. S1

Supplement: c9pp00368a3.pdf [file c9pp00368a3.pdf]

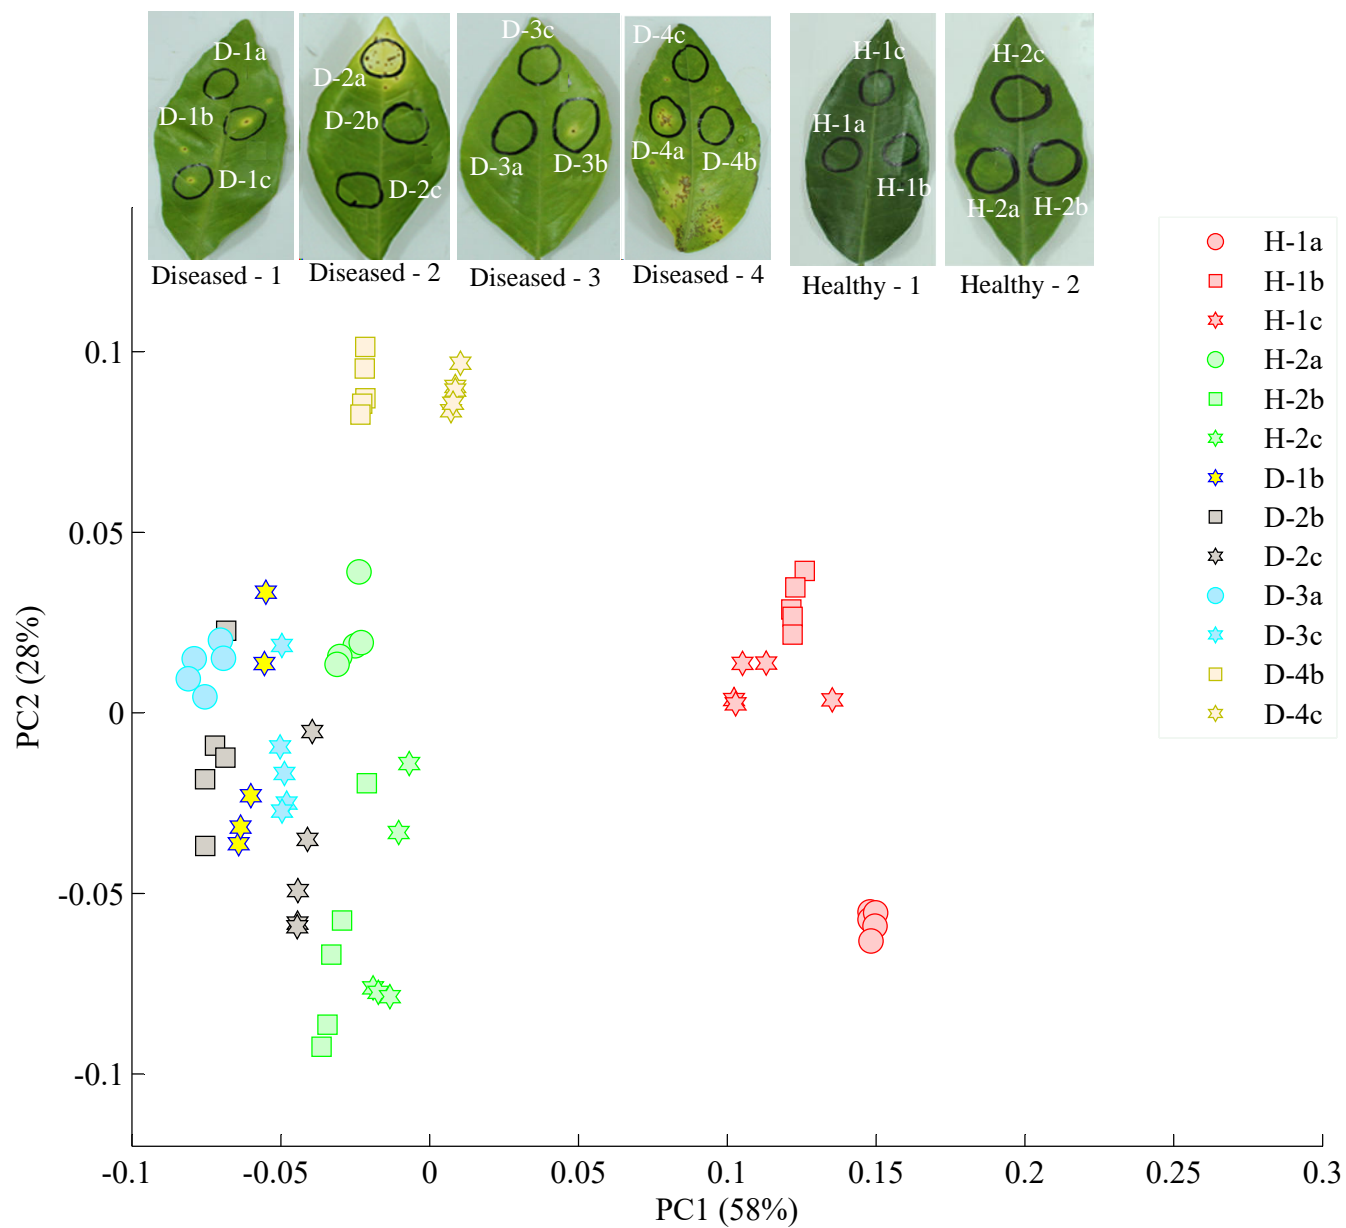

Fig. S2

Supplement: c9pp00368a4.pdf [file c9pp00368a4.pdf]

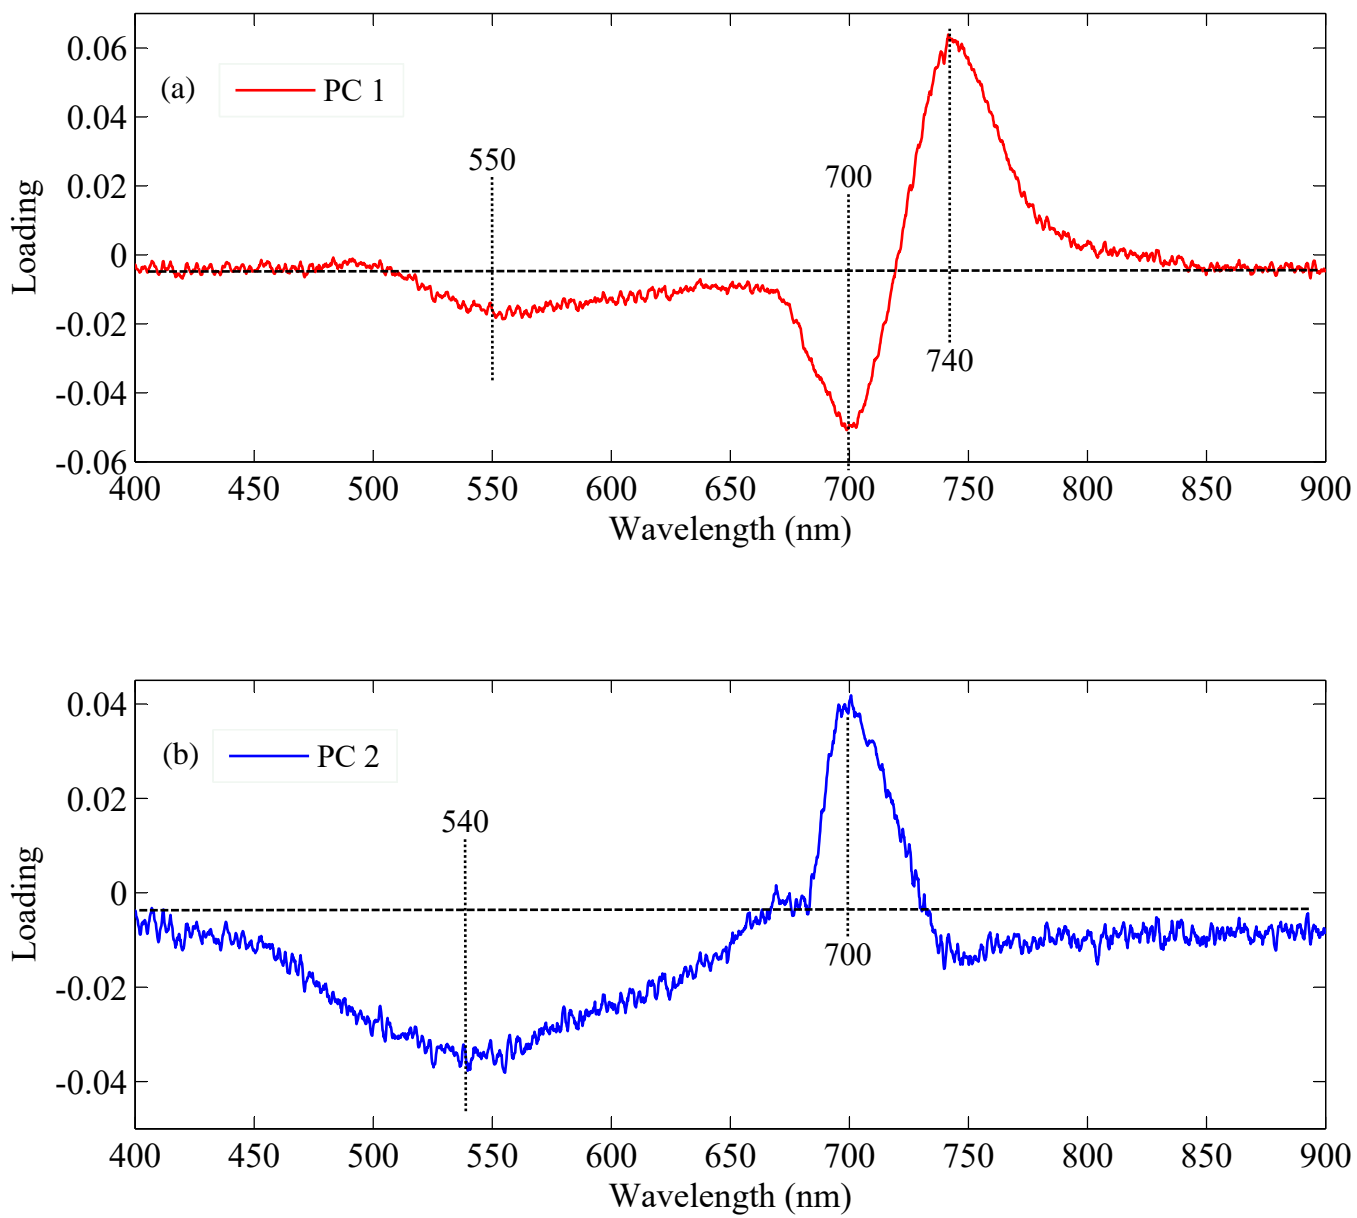

Fig. S3

Supplement: c9pp00368a5.pdf [file c9pp00368a5.pdf]

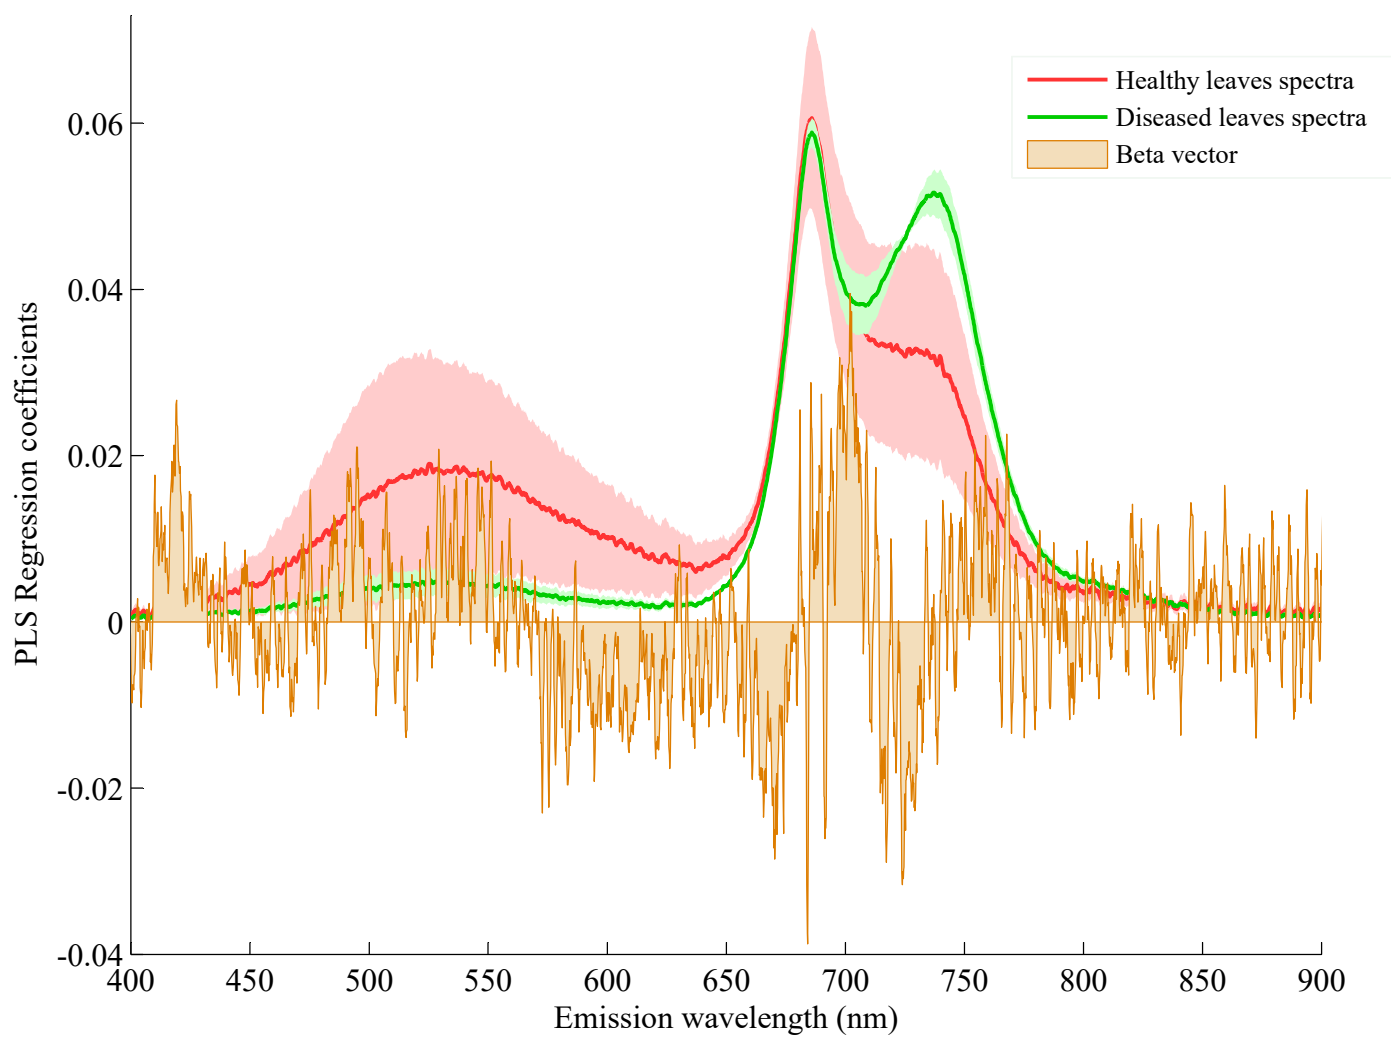

Fig. S4

Supplement: c9pp00368a6.pdf [file c9pp00368a6.pdf]

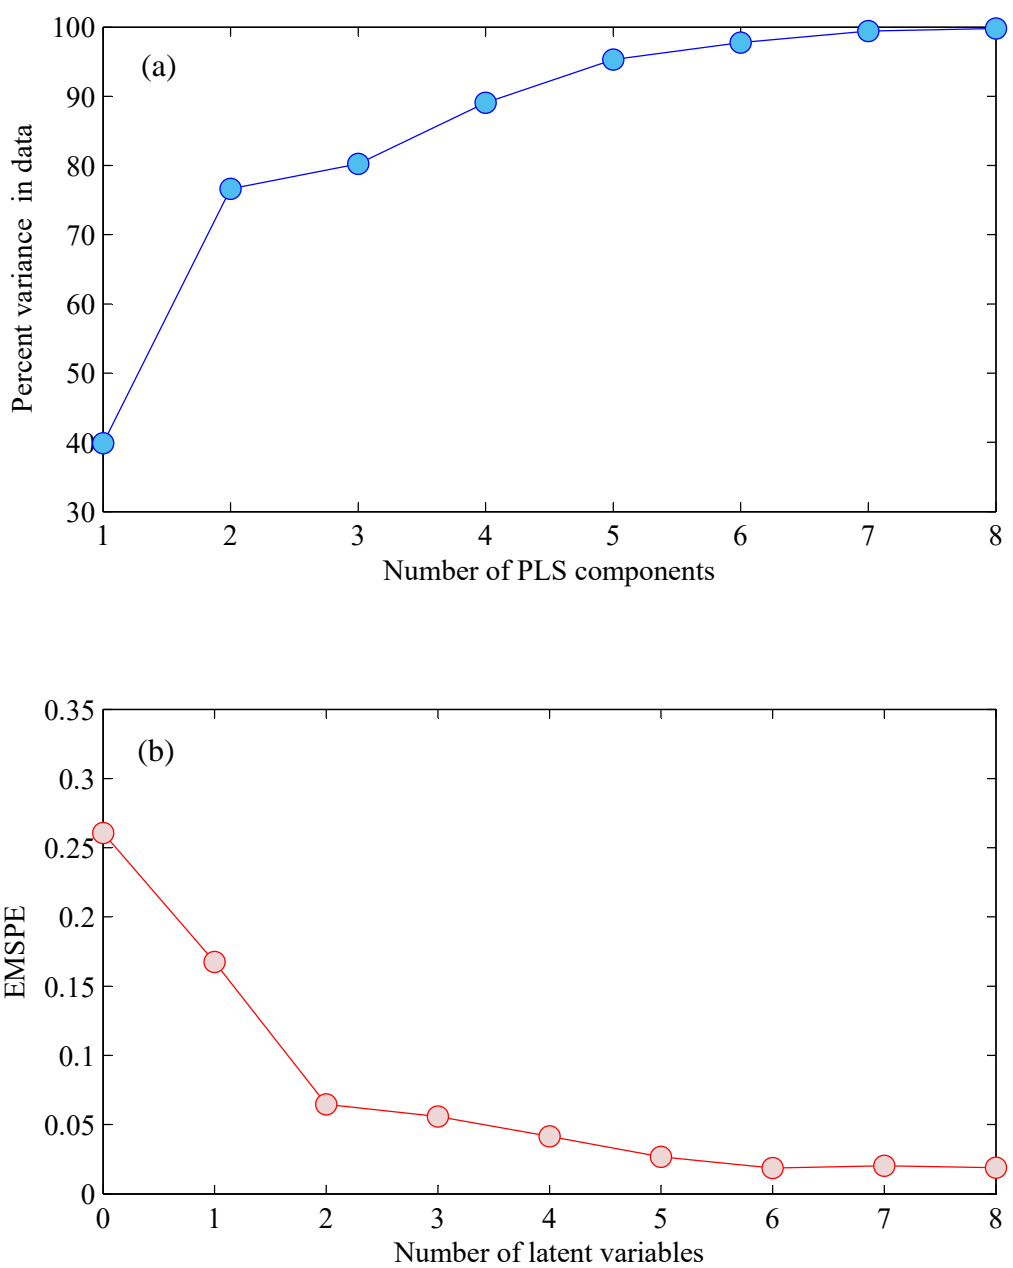

Fig. S5

Supplement: c9pp00368a7.pdf [file c9pp00368a7.pdf]
